# Supplementary material for: Establishment and characterization of fantail goldfish fin (FtGF) cell line from goldfish, Carassius auratus for in vitro propagation of Cyprinid herpes virus-2 (CyHV-2)
Source: PeerJ. 2020 Jul 14;8:e9373. doi: 10.7717/peerj.9373 (PMC7512137; doi:10.7717/peerj.9373)
Supplement: Supplemental Information 1 [file peerj-08-9373-s001.xls]

## Sheet: Sheet1
				Average	SD			Average	SD			Average	SD			Average	SD			Average	SD
20ºC		1.2	1.3	1.25	0.0707107	1.3	1.5	1.4	0.141421	1.9	1.7	1.8	0.141421	2.5	2.6	2.55	0.0707107	3	2.9	2.95	0.0707107
24ºC		1.5	1.8	1.65	0.212132	1.6	1.6	1.6	0	2.4	2.3	2.35	0.0707107	2.8	2.9	2.85	0.0707107	3.5	2.6	3.05	0.636396
28ºC		1.9	2.1	2	0.141421	2.8	2.5	2.65	0.212132	4.8	5.3	5.05	0.353553	5.3	5.2	5.25	0.0707107	5.6	5.3	5.45	0.212132
35ºC		1.9	1.8	1.85	0.0707107	2.3	2.3	2.3	0	4.2	4.4	4.3	0.141421	5	4.8	4.9	0.141421	5.2	5.3	5.25	0.0707107
37ºC		1.2	1	1.1	0.141421	2	2.3	2.2	0.212132	2.3	2.5	2.4	0.141421	3.3	3.4	3.35	0.0707107	3.2	3.3	3.25	0.0707107
	0	1	2	3	4	5
20ºC	1	1.25	1.4	1.8	2.55	2.95
24ºC	1	1.65	1.6	2.35	2.85	3.05
28ºC	1	2	2.65	5.05	5.25	5.45
35ºC	1	1.85	2.3	4.3	4.9	5.25
37ºC	1	1.1	2.2	2.4	3.35	3.25
	0	1	2	3	4	5
20ºC	0	0.0707107	0.141421	0.141421	0.0707107	0.0707107
24ºC	0	0.212132	0	0.0707107	0.0707107	0.636396
28ºC	0	0.141421	0.212132	0.353553	0.0707107	0.212132
35ºC	0	0.0707107	0	0.141421	0.141421	0.0707107
37ºC	0	0.141421	0.212132	0.141421	0.0707107	0.0707107

## Sheet: Sheet2
	0	0	1	1	2	2	3	3	4	4	5	5
0.05	1	1	1	1	1.2	1.4	2.4	2.4	2.2	2.6	2.8	3
0.075	1	1	1	1	1.5	1.5	3	2.6	3.3	3.5	3.3	3.3
0.1	1	1	1	1.4	1.8	2.2	3.4	3.8	3.8	4	4.2	4.4
0.15	1	1	1.1	1.3	2.2	2	3.5	3.7	4.7	4.7	5.1	5.3
0.2	1	1	1	1	1.6	1.6	4.2	3.8	5	4.8	5.2	5.2
	0	0	Mean	SD	1	1	Mean	SD	2	2	Mean	SD	3	3	Mean	SD	4	4	Mean	SD	5	5	Mean	SD
0.05	1	1.1	1.05	0.0707107	1.3	1.5	1.4	0.141421	2.5	2.5	2.5	0	2.5	2.4	2.45	0.0707107	2.6	2.7	2.65	0.0707107	3	3.1	3.05	0.0707107
0.075	1.4	1.2	1.3	0.141421	1.5	1.5	1.5	0	3.1	3.3	3.2	0.141421	2.9	3	2.95	0.0707107	3.6	3.7	3.65	0.0707107	3.3	3.6	3.45	0.212132
0.1	1.1	1.3	1.2	0.141421	2.2	2.3	2.25	0.0707107	3.5	3.5	3.5	0	3.6	3.9	3.75	0.212132	4.6	4.6	4.6	0	4.6	4.4	4.5	0.141421
0.15	1.5	1.2	1.35	0.212132	2.1	2	2.05	0.0707107	3.8	3.9	3.85	0.0707107	5.2	4.9	5.05	0.212132	4.7	4.8	4.75	0.0707107	5.4	5.5	5.45	0.0707107
0.2	1.2	1.1	1.15	0.0707107	1.7	1.5	1.6	0.141421	4.2	4.4	4.3	0.141421	4.8	4.7	4.75	0.0707107	5.7	5.6	5.65	0.0707107	5.6	5.9	5.75	0.212132
0.2
	0	1	2	3	4	5
0.05	1.05	1.4	2.5	2.45	2.65	3.05
0.075	1.3	1.5	3.2	2.95	3.65	3.45
0.1	1.2	2.25	3.5	3.75	4.6	4.5
0.15	1.35	2.05	3.85	5.05	4.75	5.45
0.2	1.15	1.6	4.3	4.75	5.65	5.75
	0	1	2	3	4	5
0.05	0.0707107	0.141421	0	0.0707107	0.0707107	0.0707107
0.075	0.141421	0	0.141421	0.0707107	0.0707107	0.212132
0.1	0.141421	0.0707107	0	0.212132	0	0.141421
0.15	0.212132	0.0707107	0.0707107	0.212132	0.0707107	0.0707107
0.2	0.0707107	0.141421	0.141421	0.0707107	0.0707107	0.212132

## Sheet: Sheet3
Frequency distribution of chromosomes in 100 cells
3	82
1	84
2	87
3	90
1	92
2	94
3	95
3	97
5	98
5	99
60	100
3	102
3	104
4	112
2	114
100
