# Supplementary material for: Establishment and characterization of fantail goldfish fin (FtGF) cell line from goldfish, Carassius auratus for in vitro propagation of Cyprinid herpes virus-2 (CyHV-2)
Source: PeerJ. 2020 Jul 14;8:e9373. doi: 10.7717/peerj.9373 (PMC7512137; doi:10.7717/peerj.9373)
Supplement: Supplemental Information 2 [file peerj-08-9373-s002.xlsx]

## Sheet: Sheet1
mortality curve of experimentally infected goldfish
	Infected	Control
1	0	0
2	0	0
3	0	0
4	0	0
5	7	0
6	14	0
7	17	0
8	17	0
9	51	0
10	77	0
11	90	0
12	100	0
