# Supplementary material for: Establishment and characterization of fantail goldfish fin (FtGF) cell line from goldfish, Carassius auratus for in vitro propagation of Cyprinid herpes virus-2 (CyHV-2)
Source: PeerJ. 2020 Jul 14;8:e9373. doi: 10.7717/peerj.9373 (PMC7512137; doi:10.7717/peerj.9373)
Supplement: Supplemental Information 3 [file peerj-08-9373-s003.xls]

## Sheet: Sheet4
Growth curve of CyHV-2 in FtGF cell line
1	1	1.3	1.15	0.212132
2	1.6	1.8	1.7	0.141421
3	1.8	1.95	1.875	0.106066
4	4.2	4.6	4.4	0.282843
5	5.8	5.9	5.85	0.0707107
6	7.2	7.5	7.1	0.212132
7	7.4	7.8	7.6	0.282843
8	8.2	8.1	8.15	0.0707107
9	7	7.2	7.1	0.141421
10	7.1	6.9	7	0.141421

## Sheet: Sheet1
Growth curve of FtGF cells at passage 57
1	1	1.3	1.2	1.16667	0.152753
2	1.6	1.7	1.5	1.6	0.1
3	2.1	2	2	2.03333	0.057735
4	4	4.2	4.3	4.16667	0.152753
5	7.4	7.2	7.4	7.33333	0.11547
6	7.2	7.4	7	7.2	0.2
7	7.2	6.9	6.9	7	0.173205
8	7.1	6.7	6.9	6.9	0.2
9	6.4	6.5	6.6	6.5	0.1
10	5.9	6	6.2	6.03333	0.152753
